# Supplementary material for: The Large and Diverse Family of Mediterranean Flat Breads: A Database
Source: Foods. 2022 Aug 4;11(15):2326. doi: 10.3390/foods11152326 (PMC9368210; doi:10.3390/foods11152326)
Supplement: Supplementary file 1 [file foods-11-02326-s001.zip › foods-1835792-supplementary.pdf]

**Supplementary Table S1. List of questions for interviewing the bakers on flat bread production.**

|                                                                                                                                                                                           |
|-------------------------------------------------------------------------------------------------------------------------------------------------------------------------------------------|
| <i>Product</i>                                                                                                                                                                            |
| What is the most common name of this flat bread? Please specify if you know also other names.                                                                                             |
| Is the production artisanal or industrial? (This question aims to understand how important the contribution of practical experience and manual skills is in the production of flat bread) |
| Is this flat bread produced throughout the entire country or is typical of a single town or region? (In the latter case specify the name of town or region)                               |
| In case this flat bread is produced in a single geographic area, is it marketed also outside that area?                                                                                   |
| What is the thickness of the flat bread? What is its diameter? What is its weight?                                                                                                        |
| What are the main quality features of the flat bread? (Flexibility, uniformity of color, regularity of shape...)                                                                          |
| What is the shelf life of the product?                                                                                                                                                    |
| Is the product packaged? How? (Which material? Under modified atmosphere? If yes which type?)*                                                                                            |
| What are the storage conditions?*                                                                                                                                                         |
| <i>Process</i>                                                                                                                                                                            |
| What's the recipe? (Only flour, water, yeast and salt or also other ingredients? Possibly give the ratios)                                                                                |
| What kind of flour is used (Whole grain or refined? From durum wheat, soft wheat, or other cereals or non-cereal grains?)                                                                 |
| What are the quality criteria for selecting the raw material, if known? (Protein content, gluten content, gluten quality indices)                                                         |
| Is yeast used?                                                                                                                                                                            |
| What kind of yeast is used? (Commercial bakers' yeast, chemical yeast, sourdough?)                                                                                                        |
| If fats are included in the dough, what type of fats are used? (For example lard or oil)                                                                                                  |
| Which kneader is used?                                                                                                                                                                    |
| What is the time of kneading?                                                                                                                                                             |
| What are time and temperature of leavening?                                                                                                                                               |
| How is shaping conducted? (Manually or mechanically?)                                                                                                                                     |
| Is there a second leavening? (Time and temperature?)                                                                                                                                      |
| What kind of oven is used? (Modern gas / electric oven or old-style wooden fueled oven? Is any traditional baking system used, such as "testo", "tannur" etc.?)                           |
| Could you specify time and temperature of cooking?                                                                                                                                        |
| Is a second cooking performed to dry bread? What are time and temperature?                                                                                                                |
| <i>Cultural and ethnographic features</i>                                                                                                                                                 |
| Is there any relationship between this bread and a specific religious celebration or an important time of the year for any rural tradition (harvest, sowing, etc.)?                       |
| *Questions removed after consulting with the President of a consortium of bakers specialized in the production of flat bread, because were considered too technical.                      |
